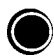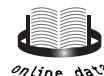

# Ser<sup>262</sup> determines the chloride-dependent colour tuning of a new halorhodopsin from *Haloquadratum walsbyi*

Hsu-Yuan FU\*<sup>1</sup>, Yung-Ning CHANG\*<sup>1</sup>, Ming-Jin JHENG\* and Chii-Shen YANG\*†<sup>2</sup>

\*Department of Biochemical Science and Technology, College of Life Science, National Taiwan University, 1 Roosevelt Road, Taipei 10617, Taiwan, and †Institute of Biotechnology, College of Bio-Resources and Agriculture, National Taiwan University, 1 Roosevelt Road, Taipei 10617, Taiwan

## Synopsis

Light is an important environmental signal for all organisms on earth because it is essential for physiological signalling and the regulation of most biological systems. Halophiles found in salt-saturated ponds encode various archaeal rhodopsins and thereby harvest various wavelengths of light either for ion transportation or as sensory mediators. HR (halorhodopsin), one of the microbial rhodopsins, senses yellow light and transports chloride or other halides into the cytoplasm to maintain the osmotic balance during cell growth, and it exists almost ubiquitously in all known halobacteria. To date, only two HRs, isolated from *HsHR* (*Halobacterium salinarum* HR) and *NpHR* (*Natronomonas pharaonis* HR), have been characterized. In the present study, two new HRs, *HmHR* (*Haloarcula marismortui* HR) and *HwHR* (*Haloquadratum walsbyi* HR), were functionally overexpressed in *Escherichia coli*, and the maximum absorbance ( $\lambda_{\max}$ ) of the purified proteins, the light-driven chloride uptake and the chloride-binding affinity were measured. The results showed them to have similar properties to two HRs reported previously. However, the  $\lambda_{\max}$  of *HwHR* is extremely consistent in a wide range of salt/chloride concentrations, which had not been observed previously. A structural-based sequence alignment identified a single serine residue at 262 in *HwHR*, which is typically a conserved alanine in all other known HRs. A Ser<sup>262</sup> to alanine replacement in *HwHR* eliminated the chloride-independent colour tuning, whereas an Ala<sup>246</sup> to serine mutagenesis in *HsHR* transformed it to have chloride-independent colour tuning similar to that of *HwHR*. Thus Ser<sup>262</sup> is a key residue for the mechanism of chloride-dependent colour tuning in *HwHR*.

**Key words:** chloride affinity, halorhodopsin, light-driven chloride pump, photocycle, spectral tuning, site-directed evolution

Cite this article as: Fu, H.-Y., Chang, Y.-N., Jheng, M.-J. and Yang, C.-S. (2012) Ser<sup>262</sup> determines the chloride-dependent colour tuning of a new halorhodopsin from *Haloquadratum walsbyi*. *Biosci. Rep.* **32**, 501–509

## INTRODUCTION

Solar light is a crucial environmental signal for most life forms, as it is intricately involved in energy harvesting and many physiological signals, including circadian rhythm and phototactic responses [1]. Featuring biological systems with light-driven systems, halophiles are known to exist widely in salt-saturated ponds. They encode four types of archaeal rhodopsins that respond to different wavelengths of light either by transporting ions, as observed in BR (bacteriorhodopsin) and HR (halorhodopsin) [2–4], or by serving as illumination sensors

that trigger different phototactic responses typified by the SRs (sensory rhodopsins) I and II found in *Halobacterium salinarum* [5–7].

All four types of microbial rhodopsins are not simultaneously encoded in the genome of a single species as they are in *H. salinarum* [1]. Only one HR and one SRII were found to exist in *Natronomonas pharaonis* [8], whereas one BR, one HR and one MR (middle rhodopsin) with ambiguous function were identified in *H. walsbyi* without any SR [9,10]. *H. marismortui*, by contrast, encodes six rhodopsins, including two BRs, one HR, SRI, SRII and SRM, which is the greatest number of microbial rhodopsins found in a single archaeon [11,12].

**Abbreviations used:** BR, bacteriorhodopsin; CCCP, carbonyl cyanide *m*-chlorophenylhydrazone; DDM, *n*-dodecyl- $\beta$ -D-maltoside; HR, halorhodopsin; *HsHR*, *Halobacterium salinarum* HR; *HmHR*, *Haloarcula marismortui* HR; *HwHR*, *Haloquadratum walsbyi* HR; LB, Luria–Bertani; Ni-NTA, Ni<sup>2+</sup>-nitrilotriacetate; *NpHR*, *Natronomonas pharaonis* HR; SR, sensory rhodopsin.

<sup>1</sup> These authors contributed equally to this work.

<sup>2</sup> To whom correspondence should be addressed (email chiishen@ntu.edu.tw).

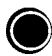

HR, however, is the most prevalent microbial rhodopsin in archaea. More than a dozen HRs have been either confirmed by protein studies or proposed in various genomic projects (Supplementary Table S1 at <http://www.bioscirep.org/bsr/032/bsr0320501add.htm>). The first HR was identified in *HsHR* (*H. salinarum* HR) and the second one was later found in *NpHR* (*N. pharaonis* HR). Previous studies have described HRs as light-driven inward anion/chloride translocators and have suggested that they facilitate BR-assisted energy production [13] and preserve the cytoplasmic osmolality equilibrium [4]. HRs therefore assist cells in producing energy and maintaining their cellular environments. It is reasonable to expect to find HRs in almost any microbe residing in a hypersaline habitat, as HRs play such an essential role for cell survival in crystallizer conditions.

Various biological and biophysical properties of *HsHR* and *NpHR* have been reported [14–16]; both HRs have been shown to absorb light maximally at approximately 575 nm, and the light-activated HRs initialize inward transport of chloride and other halides ( $\text{Br}^-$ ,  $\text{I}^-$ ) [17]. The molecular mechanism for this light-driven chloride transport has been investigated in several crystallography studies for both *HsHR* and *NpHR* [18,19]. Further studies have shown their similarity in chloride-binding affinities [20,21],  $\text{pK}_a$  [20,22] and ms-ranged photocycle kinetics [23], as well as shifts in their  $\lambda_{\text{max}}$  (maximum absorbance wavelengths) under low-chloride or low-salt concentrations. The environment-dependent  $\lambda_{\text{max}}$  shift is one of the main reasons that an engineered HR such as *NpHR* 3.0 [24], a mutant based on *NpHR* that was designed to serve as a nerve de-activation signal, was developed for optogenetic technology.

The HR gene proposed in the *H. walsbyi* genome [9] is intriguing because *H. walsbyi* cells are one of the most widely distributed halobacteria, globally present from shallow ocean coastal areas to crystallized ponds [25], with a variety of chloride concentrations. All HRs from other species were shown to be sensitive to chloride concentrations [20,21]. The ability of this newly proposed *HwHR* (*H. walsbyi* HR) to survive in environments with great variation in salinity or osmolality is investigated in the present study.

The *HwHR*, together with *HmHR* (*Haloarcula marismortui* HR), was first overexpressed and then purified for *in vitro* characterization. Both *HmHR* and *HwHR* were found to share most of the conserved functions and properties that have been observed for other known HRs; however, *HwHR* showed unique salt-independent changes in  $\lambda_{\text{max}}$ , a feature not observed in any of the other HR proteins characterized to date. A single residue substitution, which was chosen via structure-based sequence alignment, eliminated such chloride-independent spectral tuning.

## MATERIALS AND METHODS

### Bacterial strains and plasmids

*Escherichia coli* DH5 $\alpha$  cells were used for cloning and *E. coli* C43(DE3) cells were used for protein expression.

The genes of *HmHR* [12] and *HsHR* [26] were cloned from genomic DNA, and *HwHR* [9] was synthesized by Genomics with the addition of a *NcoI* restriction enzyme cutting site before the start codon and a *XhoI* restriction enzyme cutting site after the stop codon. The DNA fragment was treated with restriction enzymes and ligated into a *NcoI*–*XhoI*-treated pET-21d vector. As described previously [27], the expressed N- and C-terminal peptide sequences are as follows: *HmHR*: <sup>1</sup>MTAAST...TPADD<sup>276</sup>KLAAALEHHHHHH and *HwHR*: <sup>1</sup>MAQHLY...AVADD<sup>292</sup>LEHHHHHH. The site-directed mutagenesis was performed according to the instruction manual from the QuikChange™ Lightning Site-Directed Mutagenesis Kit.

### Protein expression and purification

A single colony of transformed *E. coli* C43(DE3) cells was inoculated in LB (Luria–Bertani) medium supplemented with 50  $\mu\text{g}/\text{ml}$  of ampicillin and incubated at 37 °C overnight. For large-scale protein expression, a 1:100 (v/v) dilution of overnight culture was added to a fresh LB/ampicillin medium and incubated at 37 °C. When the  $D_{600}$  of the culture reached 0.4–0.6, IPTG (isopropyl  $\beta$ -D-1-thiogalactopyranoside; final concentration 1 mM) and all-*trans* retinal (final concentration 5–10  $\mu\text{M}$ ) were added for induction. Following subsequent incubation for 4–6 h in the dark, cells were collected by centrifugation at 6750 *g* for 10 min at 4 °C (Hitachi CR-21, R10A3). The collected cells were re-suspended in buffer A (50 mM Tris/HCl, 4 M NaCl, 14.7 mM 2-mercaptoethanol and 0.2 mM PMSF, pH 7.8) and broken by ultrasonic processing (S-3000; MISONIC). For the separation of the membrane fraction, total cell-extract centrifugation was performed at 2330 *g* for 30 min at 4 °C (KUBOTA 5910). Then, the supernatant was centrifuged at 169 538 *g* for 1 h at 4 °C (Beckman L-90, Ti-70). The sediment was dissolved in buffer B (buffer A supplemented with 1% DDM (n-dodecyl- $\beta$ -D-maltoside) for at least 12 h at 4 °C, followed by centrifugation at 32 816 *g* for 45 min at 4 °C (Hitachi CR-21, R20A2) to separate the detergent-soluble fraction. Solubilized HRs were purified by affinity purification using the Ni-NTA ( $\text{Ni}^{2+}$ -nitrilotriacetate) method. The detergent-soluble solution containing 20 mM imidazole was incubated with Ni-NTA agarose at 4 °C for 6–8 h of slow rotation. It was then transferred to a chromatography column and washed with buffer C (buffer A with 0.05% DDM and 50 mM imidazole). The target HRs were eluted with buffer D (buffer A with 0.05% DDM and 250 mM imidazole). Purified HRs were concentrated and exchanged into buffer E (50 mM Mes, 4 M NaCl and 0.05% DDM, pH 5.8) with a protein concentrator (Millipore, Amicon, cut-off size of 30 kDa).

### Light-driven ion transporter assay

*E. coli* cells with overexpressed HR were prepared as described previously using protein overexpression and purification protocols [12,28]. Induced cells without all-*trans* retinal addition served as a control. The collected cells were washed twice using an unbuffered solution (10 mM NaCl, 10 mM  $\text{MgSO}_4$  and

100  $\mu\text{M}$   $\text{CaCl}_2$ ) and suspended with an adequate amount of fresh buffer. The suspended cells were illuminated with green laser light, and the extracellular pH change was monitored with a probe (Eutech Instruments, CyberScan pH 2100). After 100 s of illumination, the dark incubation of an additional 100 s was also recorded. The illumination followed by dark incubation procedure was repeated three times. To check for passive proton uptake, experiments using suspended cells with CCCP (carbonyl cyanide *m*-chlorophenylhydrazone; Sigma C2759; to a final concentration of 10  $\mu\text{M}$ ) were performed as described above. All pH changes were recorded with the CyberComm Pro program and exported as .csv files.

### **pK<sub>a</sub> determination**

The purified proteins were diluted with buffers at different pH values (100-fold dilution). UV/Vis absorption spectra of 12 protein samples of pHs varying from 5.8 to 10.93 were recorded. To evaluate the wavelength that indicated the maximum absorbance change, all spectra were plotted together or subtracted. In HRs, the acidic–basic absorbance at 575 nm (*HmHR*) and 572 nm (*HwHR*) was calculated in relative units and plotted against the pH values. The sigmoid curve generated was fit to the following equation:  $\text{Abs} = \text{Abs}_{\text{acidic}} + \text{Abs}_{\text{basic-acidic}} \times (10^{\text{pH} - \text{pK}_a})$ . A similar equation named DoseResp in Origin® was also used:  $y = A_1 + (A_2 - A_1) / (1 + 10^{(\text{LOGx0} - x)^p})$ ; the symbol LOGx0 was denoted as the pK<sub>a</sub> value.

### **Chloride titration assay**

The purified *HwHR* was adjusted to different chloride concentrations to determine the chloride-binding affinity as described in previous studies with a slight modification [19,20]. The NaCl concentration was reduced from 4 M to 0.015 mM in a 50 mM Mes buffer, pH 5.8 (or in 50 mM Mops buffer, pH 7.0). At each chloride concentration, the UV/Vis spectrum was recorded and normalized using  $A_{280}$  as a standard. The amplitude changes of the absorbance in relative units were plotted against the chloride concentration (log<sub>10</sub> scale), then the resulting curve was fitted to the Hill equation ( $R^2 > 0.95$ ). The following Hill equation was adopted for analysis:  $y = (V_{\text{max}} \times x^n) / (k^n + x^n)$ ;  $k$  denotes the dissociation constant.

### **Flash-laser induced photocycle measurements**

Nd-YAG laser (532 nm, 6 ns pulse, 40 mJ) flash-absorbance changes were measured by employing a laboratory-constructed laser cross-beam flash spectrometer as previously described [12]. The purified proteins were dissolved in buffer E to reach 0.3 at a maximum-wavelength ( $\lambda_{\text{max}}$ ) ( $A_{\text{max}}$ ), and transient-absorbance changes were recorded at their corresponding ground-state maximum. The curves represent the loss and recovery of absorbance at the target wavelengths upon green laser ( $\lambda_{\text{ex}} = 532 \text{ nm}$ ).

## **RESULTS**

### **Sequence alignment of known and proposed HR genes from *Halobacteria***

HRs are prevalent in *Halobacteria*; more than 15 strains (Supplementary Table S1) of *Halobacteria* have been completely sequenced to date, and at least nine of these were proven or predicted to have *hop* genes. A phylogenetic tree (Figure 1a) and sequence alignment (Figure 1b, and Supplementary Figure S1 at <http://www.biosciencerep.org/bsr/032/bsr0320501add.htm>) of 17 annotated HRs showed high sequence identity (55–68%) among them, and the previously reported key residues involved in chloride transportation, i.e. Arg<sup>108</sup>/Thr<sup>111</sup> and Arg<sup>200</sup>/Thr<sup>203</sup> in *HsHR* [18], were found to be conserved in all HRs. Although the classification of HRs were not correlated with the evolution [29], *HmHR* and *HwHR*, which were the focus in the present study, showed higher sequence similarity with *NpHR* and *HsHR* respectively.

### **Purification and spectral characterization of *HmHR* and *HwHR***

To examine and compare the spectral characteristics of HR proteins, we overexpressed and purified His<sub>6</sub>-tagged *HmHR* and *HwHR* proteins using the *E. coli* C43(DE3) system according to previously described protocols [12]. This procedure yielded several mg/l of culture.

The UV/Vis spectra showed the  $\lambda_{\text{max}}$  of *HmHR* to be 576 nm (Figure 2a), whereas the  $\lambda_{\text{max}}$  of *HwHR* was 573 nm (Figure 2b). Compared with all well-known HRs, all of them were within approximately 3 nm of 575 nm (summarized in Supplementary Table S3 at <http://www.biosciencerep.org/bsr/032/bsr0320501add.htm>).

### **Light-driven chloride transport activity measurements**

Light-driven inward chloride transport measurements for *HmHR* and *HwHR* were performed to examine their function as illumination-dependent chloride translocators, using previously described procedures [12]. Light-dependent pH increases were recorded in both *HmHR* (Figure 2c) and *HwHR* (Figure 2d) samples with or without CCCP. The observed tendency of light-driven proton transport in both HRs were in fact passive processes accelerated by light-driven chloride inward transportation as explained in a previous study [27], indicating that light-driven inward chloride transport occurred. Thus both *HmHR* and *HwHR* proteins demonstrated light-driven inward chloride transport, confirming their conserved function as observed in two other HRs.

### **Flash laser-induced absorbance changes of *HmHR* and *HwHR***

To investigate the photocycle, the defining feature of the two HRs, time-resolved flash photolysis was measured. The data

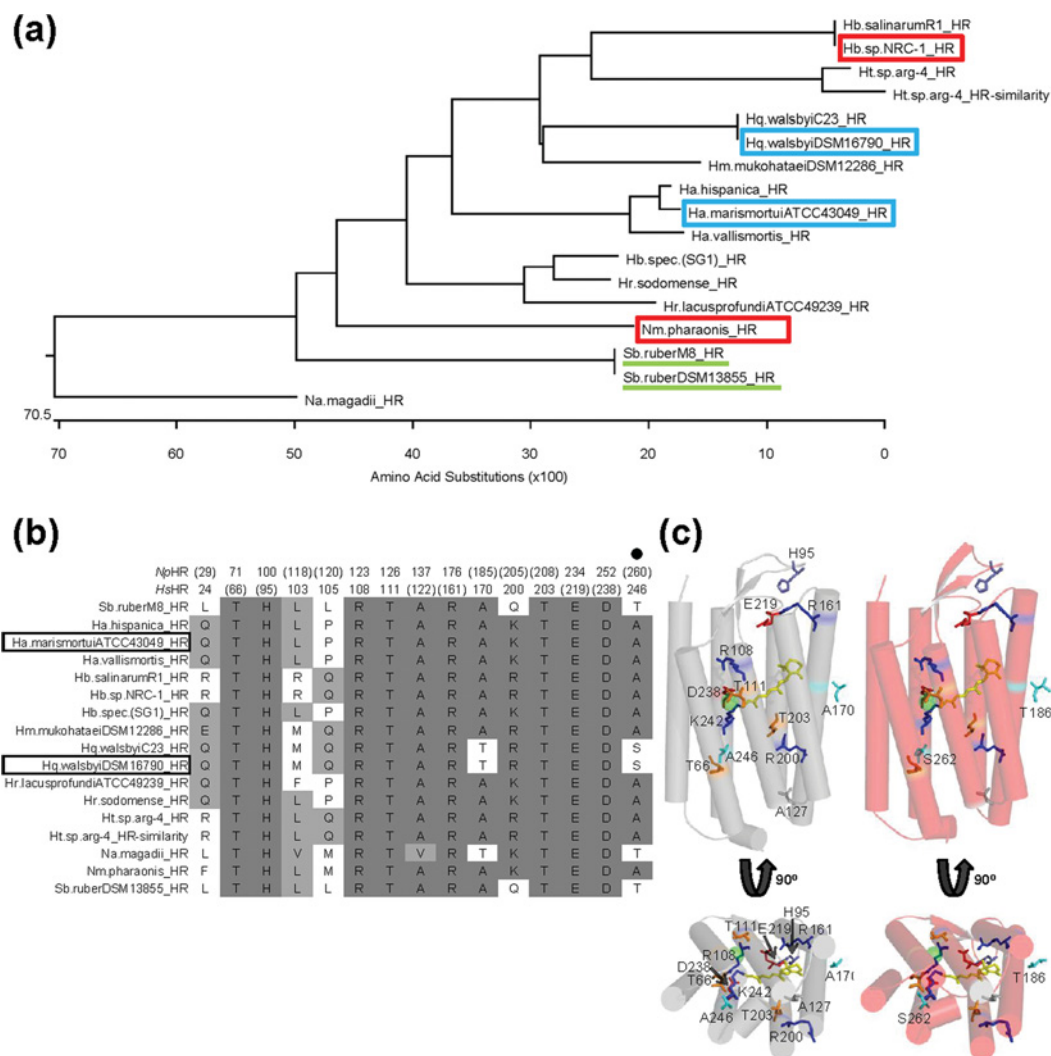

**Figure 1 Bioinformatic analysis of microbial HRs and structural alignment of HsHR and HwHR**

(a) Phylogenetic tree of 17 annotated microbial HRs. The green-underlined organisms are the sources of the two HRs from bacteria. The red rectangles indicate the two well-studied HRs from *Halobacterium salinarum* and *Natronobacterium pharaonis*; the blue rectangles indicate the two HRs from HmHR and HwHR in the present study. (b) Amino acid sequence alignment of critical residues involved in chloride translocation and of interest in the present study. The first two rows are numbered with the atomic resolution structures based on NpHR (PDB ID: 3A7K) and HsHR (PDB ID: 1E12). The black rectangles indicate the two HRs in the present study. The shadowed grey scale marks the conserved residues, and the critical spectral tuner one is annotated with the black spot. (c) Structural information of HsHR (grey, PDB ID: 1E12) and HwHR (red, modelled by SWISS-MODEL). The conserved chloride transport residues (stick) are labelled with their name and number (Thr<sup>66</sup>, His<sup>95</sup>, Arg<sup>108</sup>, Thr<sup>111</sup>, Ala<sup>127</sup>, Arg<sup>161</sup>, Arg<sup>200</sup>, Thr<sup>203</sup>, Glu<sup>219</sup> and Asp<sup>238</sup>). The yellow stick is *all-trans* retinal; the conserved residues Thr<sup>111</sup> and Asp<sup>238</sup> harbour a chloride ion (green sphere) in the structures of HsHR and HwHR. The residues (cyan stick) indicate the mutated site of HwHR in this study. The top is the periplasmic region and the bottom is the cytoplasm. The 90° rotation is for the bottom view for both HRs.

at different salt concentrations are shown along with time-dependent absorbance changes at 580 nm. The half-life of the ground state recovery is 4.17 and 3.23 ms of HmHR and HwHR respectively, under 4 M NaCl (Figures 2e and 2f). When exposed to a buffer of low ionic strength with 5 mM NaCl and 333 mM Na<sub>2</sub>SO<sub>4</sub>, the recovery times are slightly different in both HRs (Supplementary Table S2 and Figure S3 at <http://www.bioscience.org/bsr/032/bsr0320501add.htm>).

### Chloride-binding affinity of HmHR and HwHR

The *H. walsbyi* cells were shown to tolerate 2 M MgCl<sub>2</sub>, an unusual environment for any other currently known HRs. To investigate this observation, the chloride-dependent spectral shifts of HwHR and HmHR were measured (Figure 3). The chloride-dependent spectral shift indicates the binding affinity of chloride ions to HRs, which is analogous to the binding behaviour of a ligand to a receptor, and it can be described via the Hill

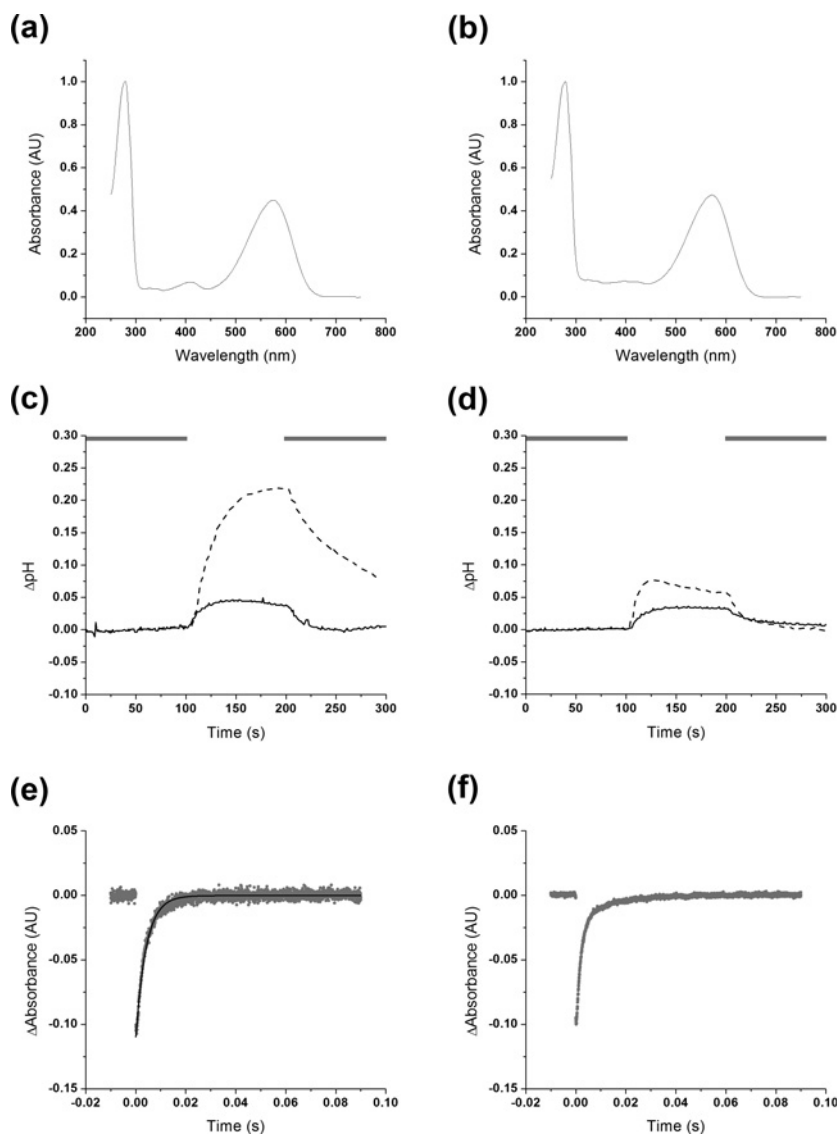

**Figure 2 Spectroscopic characterization and functional determination of *HmHR* and *HwHR***

UV/Vis absorbance spectra of *HmHR* (a) and *HwHR* (b). The purified protein was resuspended in a buffer containing 50 mM Mes, 4 M NaCl, pH 5.8 and 0.05% DDM. The passive proton uptake activity of *HmHR* (c) and *HwHR* (d) expressed in *E. coli* is shown. The grey bar region indicates the sample incubated under the dark condition, and the illumination period was 100 s, then followed by another 100 s of dark incubation. The solid line shows the sample treated without CCCP and the dotted line indicates the sample with CCCP. Laser-induced absorbance changes of *HmHR* (e) and *HwHR* (f) under 50 mM Mes, 4 M NaCl and 0.05% DDM, pH 5.8. The absorbance change was monitored at 580 nm. The data were analysed and fitted to one exponential decay (shown as a black line) for photocycle recovery half time.

equation [21]. The results showed that, for *HmHR* (Figure 3a), an approximately 15 nm shift was observed in conditions of less than 1 M of chloride. The spectral shifts ceased at 591 nm when the concentration of NaCl fell below 1 mM, and the so-called ‘blue HR’ (Figure 3a, inset) was formed as observed in other studies [11,19]. *HmHR* had no spectral changes from 4 to 1 M NaCl. *HwHR* (Figure 3b), by contrast, showed no significant spectral shift throughout various chloride concentrations, with only a slight 2–3 nm of either redshifted or blueshifted changes observed in the range of 250 mM to 15  $\mu$ M NaCl before finally settling at 576 nm, close to the ground state.

Furthermore, when both *HmHR* and *HwHR* were placed in a low-chloride or chloride-free buffer, *HmHR* became ‘blue HR’ as mentioned above, while *HwHR* remained purple without a significant  $\lambda_{\max}$  change (Figure 3b, inset). As previous studies showed that under very low chloride conditions, the  $\lambda_{\max}$  of *HsHR* [30] was reported to be 568 nm (a blueshift of approximately 10 nm from 578 nm), and the  $\lambda_{\max}$  was 599 nm, a redshift of approximately 20 nm, in *NpHR* [21], *HwHR* thus showed an exceptionally high tolerance to any chloride concentration changes.

Further analysis of the calculated difference spectra of *HmHR* (Figure 3c) and *HwHR* (Figure 3d) indicated that the decrease of

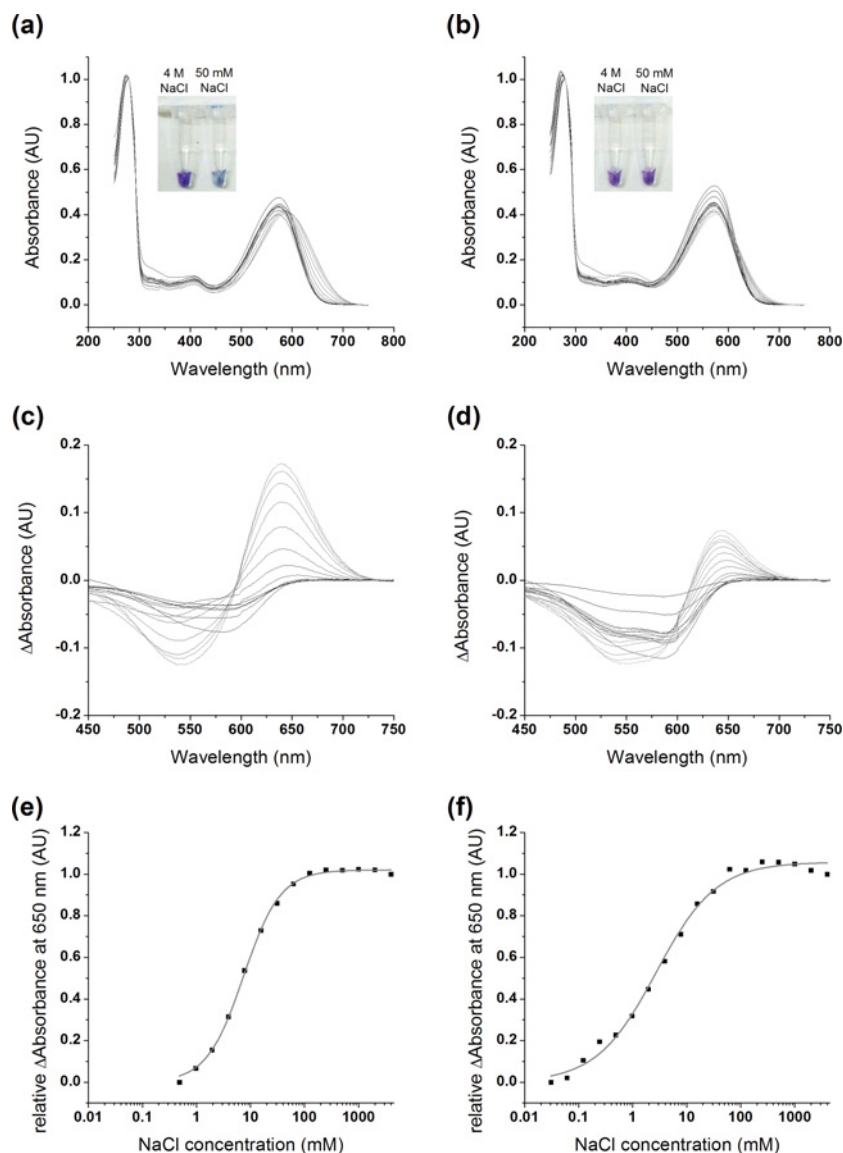

**Figure 3 Chloride-dependent spectral changes in the absorption spectrum of HRs obtained from *E. coli* membrane**  
 The spectral changes of *HmHR* (a) and *HwHR* (b); the corresponding difference spectra of *HmHR* (c) and *HwHR* (d); the absorbance change at 650 nm of *HmHR* (e) and *HwHR* (f) are shown, respectively. Purified HRs were incubated in the buffer solutions, which consisted of 50 mM Mes, pH 5.8, including 0.05% DDM and the appropriate amount of NaCl. In (a, b), the insert pictures show the purified HR, which was resuspended under the noted condition. In (a–d), the grey scale indicates the decrease of chloride concentrations. In (e, f), the absorbance changes were normalized and the solid line denotes the best-fitted model.

chloride concentration made both HRs show a decreased fraction at approximately 550 nm and an increased fraction at approximately 650 nm. An isosbestic point was observed at approximately 600 nm in *HwHR* but not in *HmHR*, further suggesting that a one-step transition conformational change from the chloride-unbinding to binding state occurred in *HwHR* but not in *HmHR*. The amplitude changes ( $\Delta A$ ) at 650 nm were used to determine the dissociation constant  $K_d$  values, and they were 7.47 mM (Figure 3e) and 2.74 mM (Figure 3f) for *HmHR* and *HwHR* respectively. Those values were similar to the previously reported 10 mM for *HsHR* and 1 or 3 mM for *NpHR* [16,20,31], indic-

ating the similarity in chloride binding affinity among all four HRs.

### The structural-based sequence analysis of HRs for the unique chloride-independent spectra feature

Further investigating the retinal binding pocket at approximately 10 Å (where 1 Å = 0.1 nm), we identified two unique residues that were not conserved only in *HwHR* (Figures 1b and 1c); one was Thr<sup>186</sup> and the other was Ser<sup>262</sup> of *HwHR*. Both residues are typically alanine in other known HRs (Figure 1b, and Supplementary Figure S1). According to a structural model created

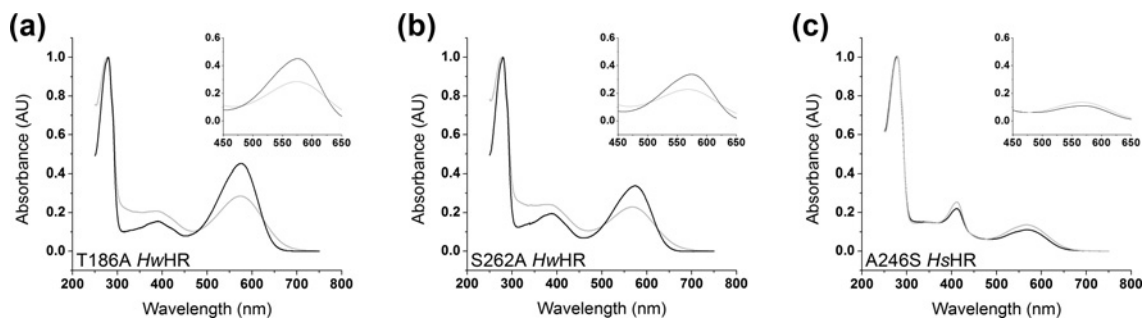

**Figure 4** Chloride-dependent spectra of various mutants of *HwHR* and A246S *HsHR*

The UV/Vis spectra of T186A *HwHR* (a), S262A *HwHR* (b) and A246S *HsHR* (c) were measured under different chloride concentrations to determine the chloride-dependent colour tuning. All purified proteins were dissolved in 50 mM Mes (pH 5.8) and 0.05% DDM buffer containing 4 M NaCl (black line) or 0 M NaCl (grey line).

with Swiss Model, the Thr<sup>186</sup> in *HwHR* points out towards the membrane region on the helix E, but Ser<sup>262</sup> is orientated inward towards the Schiff base, the chloride-binding pocket on helix G (Figure 1c, right-hand panel).

#### The residue Ser<sup>262</sup> of *HwHR* eliminated the unique feature of *HwHR* in the chloride-dependent $\lambda_{\max}$ shift

As Thr<sup>186</sup> and Ser<sup>262</sup> are both typically conserved alanine residues in other known halobacterial HRs, single residue substitutions of T186A and S262A in *HwHR* were constructed. The S262A-*HwHR* eliminated the chloride-independent  $\lambda_{\max}$  change feature (Figure 4b), as a blueshift of approximately 8 nm under low chloride conditions was observed but T186A-*HwHR* (Figure 4a) behaved like the wild-type. However, the light-driven chloride-pumping capability and the photocycle of S262A were comparable with the wild-type (Supplementary Table S4 at <http://www.bioscience.org/bsr/032/bsr0320501add.htm>). The chloride-binding affinity assay showed that the  $K_d$  was 10.40 mM for the S262A-*HwHR*, comparable with *HsHR*. The Hill coefficient ( $n$ ) was 0.91, suggesting no significant change in chloride-binding from *HwHR*.

#### *HsHR* planted with corresponding Ser<sup>262</sup> showed no chloride-dependent $\lambda_{\max}$ change

The Ser<sup>262</sup> in *HwHR* was engineered to *HsHR*, which was determined to be closer in sequence alignment, in order to create an A246S-*HsHR*, and the chloride-dependent  $\lambda_{\max}$  shift was eliminated (Figure 4c, and Supplementary Table S4); it showed a stable  $\lambda_{\max}$  at 568 nm from 4 M to 0.4 mM NaCl solutions.

## DISCUSSION

HR proteins represent an effective biological mechanism that directly elevates the capability of early life forms to cope with extremely high salt environments, which is the case for most *Halobacteria*. In the present study, *HwHR* from *H. walsbyi* was

shown to function as a light-driven chloride transporter with a stable  $\lambda_{\max}$  even under almost chloride-free conditions, a feature not yet observed in any other known HRs. The serine residue at position 262 of *HwHR* was found to act as a spectrum stabilizer, causing such chloride-independent  $\lambda_{\max}$  change.

Chloride binding is known to be important for maintaining a stable  $\lambda_{\max}$ , but the chloride-binding network in *HwHR* might have slight variations from other known HRs. According to the structural model of *HwHR* (Figure 1c), the Ser<sup>262</sup> located at helix G faces the Thr<sup>66</sup> at helix B, and together they can form a chloride stabilizer with their polar hydroxyl groups. Thr<sup>66</sup> is known to be important in chloride translocation paths, and Ser<sup>262</sup> is an alanine, a non-polar group, in all other annotated HRs except for *Natrialba magadii* and *Salinibacter ruber*. When A246S-*HsHR* was constructed to have this Ser<sup>262</sup> corresponding to *HwHR*, the chloride-dependent  $\lambda_{\max}$  shift was eliminated, and it stayed at 568 nm from 4 M to 0.4 mM NaCl solutions.

It is mainly retinal and its surrounding chemical environment that contribute the colour, or absorbance, of a retinal-binding protein. Retinal divides the HRs into extracellular and cytoplasmic regions. Among them, residues Arg<sup>108</sup>/Thr<sup>111</sup> locate in the extracellular region in *HsHR* and they are involved in transportation of an anion into the cytoplasmic region, which contains three conserved residues, Thr<sup>66</sup>/Arg<sup>200</sup>/Thr<sup>203</sup> [32,33]. On the other hand, the Ser<sup>262</sup> in *HwHR* and Ala<sup>246</sup> in *HsHR* identified in the present study appear to locate near the cytosolic region containing conserved residues Thr<sup>82</sup>/Arg<sup>216</sup>/Thr<sup>219</sup> in *HwHR* and Thr<sup>66</sup>/Arg<sup>200</sup>/Thr<sup>203</sup> in *HsHR* that were known to be important for chloride translocation. Specifically, during the catalytic cycle of HRs, the chloride ion was proposed to move to Thr<sup>203</sup> before being released into the cytosol [18,34]. Therefore a slightly different chloride translocation network in the cytoplasmic region formed via residues Thr<sup>82</sup>/Arg<sup>216</sup>/Thr<sup>219</sup>/Ser<sup>262</sup> in *HwHR* can be thus proposed.

This explanation is consistent with previously reported observations that the  $\lambda_{\max}$  shifts occur in various HRs (Supplementary Figure S4) under 0–4 M NaCl environments: *NpHR* [20] showed a 22 nm blueshift, a 13 nm redshift in *HsHR* [19] and a 15 nm blueshift in *HmHR*, while either a red- or blueshift within 3 nm was detected in *HwHR*. In the chloride-free



environment, *HwHR* was the only HR that showed no conversion into the so-called ‘purple HR’. Other results in the present study also support *HwHR* having a different chloride binding conformation. First, the lack of a clear isosbestic point in *HmHR* (Figure 4a) suggested that there are either multiple binding sites for the chloride or multiple conformations of the protein, but not in *HwHR*. Secondly, the Hill coefficient depicts the co-operation of ligand binding, and *HmHR* had a slightly larger Hill coefficient than that of *HwHR* ( $nHmHR = 1.27$ ,  $nHwHR = 0.79$ ), suggesting that there was most likely a slight variation in the ionic network for chloride binding among the residues between *HmHR* and *HwHR*.

*HwHR* might have a single chloride-binding site instead of two. Two chloride-binding sites were found in *HsHR* [35], and they occurred in the Schiff-base region, as in most HRs, with a three-residue binding motif composed of two positively charged arginine residues and a glutamate residue. Sequence analysis (Figure 1b, and Supplementary Figure S1) showed the second non-Schiff base chloride-binding site, which stabilized chloride with residues Arg<sup>24</sup>, Arg<sup>103</sup> and Gln<sup>105</sup> in *HsHR*, is not conserved in *HwHR*.

As the hydroxy groups exist in both side chains of serine and threonine, and both amino acids also occupy similar spaces in the side chains, the explanation for Ser<sup>262</sup> to have such an impact in chloride-dependent  $\lambda_{max}$  changes of *HwHR* requires further study.

In conclusion, *HwHR* had an unexpectedly stable  $\lambda_{max}$  regardless of environmental chloride concentration, a feature not previously observed in any other HR. This feature is, at least partially, contributed by the residue Ser<sup>262</sup>, and the residue’s arrangement that is determined by the structural conformation can explain this observation. This unique tolerance of *HwHR* for a chloride-free environment could further provide information in understanding the colour tuning in HR and the strategies adopted by early life forms to survive ever-changing environments.

#### AUTHOR CONTRIBUTION

Hsu-Yuan Fu, Yung-Ning Chang and Chii-Shen Yang contributed to writing the paper. Hsu-Yuan Fu and Chii-Shen Yang contributed to the organization of the paper. Yung-Ning Chang performed the wild-type HRs biochemical and biophysical analysis. Hsu-Yuan Fu performed the site-directed evolution approach including construction, mutant protein analysis and data arrangement. Ming-Jin Jheng performed the light-driven pump assay for mutant HRs.

#### FUNDING

This work was supported by Tai-He Yang (Giant Lion Know-How Co. Ltd, Taiwan).

#### REFERENCES

1 Briggs, W. R. and Spudich, J. L. (2006) Handbook of photosensory receptors, Wiley–VCH, New York

2 Oesterhelt, D. and Stoekenius, W. (1971) Rhodopsin-like protein from the purple membrane of *Halobacterium halobium*. *Nat. New Biol.* **233**, 149–152

3 Matsuno-Yagi, A. and Mukohata, Y. (1980) ATP synthesis linked to light-dependent proton uptake in a rad mutant strain of *Halobacterium* lacking bacteriorhodopsin. *Arch. Biochem. Biophys.* **199**, 297–303

4 Schobert, B. and Lanyi, J. K. (1982) Halorhodopsin is a light-driven chloride pump. *J. Biol. Chem.* **257**, 10306–10313

5 Bogomolni, R. A. and Spudich, J. L. (1982) Identification of a third rhodopsin-like pigment in phototactic *Halobacterium halobium*. *Proc. Natl. Acad. Sci. U.S.A.* **79**, 6250–6254

6 Spudich, J. L. and Bogomolni, R. A. (1984) Mechanism of colour discrimination by a bacterial sensory rhodopsin. *Nature* **312**, 509–513

7 Takahashi, T., Mochizuki, Y., Kamo, N. and Kobatake, Y. (1985) Evidence that the long-lifetime photointermediate of s-rhodopsin is a receptor for negative phototaxis in *Halobacterium halobium*. *Biochem. Biophys. Res. Commun.* **127**, 99–105

8 Falb, M., Pfeiffer, F., Palm, P., Rodewald, K., Hickmann, V., Tittor, J. and Oesterhelt, D. (2005) Living with two extremes: conclusions from the genome sequence of *Natronomonas pharaonis*. *Genome Res.* **15**, 1336–1343

9 Bolhuis, H., Palm, P., Wende, A., Falb, M., Rampp, M., Rodriguez-Valera, F., Pfeiffer, F. and Oesterhelt, D. (2006) The genome of the square archaeon *Haloquadratum walsbyi*: life at the limits of water activity. *BMC Genomics* **7**, 169

10 Sudo, Y., Ihara, K., Kobayashi, S., Suzuki, D., Irieda, H., Kikukawa, T., Kandori, H. and Homma, M. (2011) A microbial rhodopsin with a unique retinal composition shows both sensory rhodopsin II and bacteriorhodopsin-like properties. *J. Biol. Chem.* **286**, 5967–5976

11 Baliga, N. S., Bonneau, R., Facciotti, M. T., Pan, M., Glusman, G., Deutsch, E. W., Shannon, P., Chiu, Y., Weng, R. S., Gan, R. R. et al. (2004) Genome sequence of *Haloarcula marismortui*: a halophilic archaeon from the Dead Sea. *Genome Res.* **14**, 2221–2234

12 Fu, H. Y., Lin, Y. C., Chang, Y. N., Tseng, H., Huang, C. C., Liu, K. C., Huang, C. S., Su, C. W., Weng, R. R., Lee, Y. Y. et al. (2010) A novel six-rhodopsin system in a single archaeon. *J. Bacteriol.* **192**, 5866–5873

13 Wagner, G., Traulich, B., Hartmann, K. M. and Oesterhelt, D. (1987) Photochromic synergism of bacteriorhodopsin- and halorhodopsin-mediated photophosphorylation in *Halobacterium halobium*. *Photochem. Photobiol.* **46**, 393–402

14 Matsuno-Yagi, A. and Mukohata, Y. (1977) Two possible roles of bacteriorhodopsin; a comparative study of strains of *Halobacterium halobium* differing in pigmentation. *Biochem. Biophys. Res. Commun.* **78**, 237–243

15 Mukohata, Y. and Kaji, Y. (1981) Light-induced membrane-potential increase, ATP synthesis, and proton uptake in *Halobacterium halobium*, R1mR catalyzed by halorhodopsin: effects of N,N'-dicyclohexylcarbodiimide, triphenyltin chloride, and 3,5-di-tert-butyl-4-hydroxybenzylidenemalononitrile (SF6847). *Arch. Biochem. Biophys.* **206**, 72–76

16 Bivin, D. B. and Stoekenius, W. (1986) Photoactive retinal pigments in haloalkaliphilic bacteria. *J. Gen. Microbiol.* **132**, 2167–2177

17 Seki, A., Miyauchi, S., Hayashi, S., Kikukawa, T., Kubo, M., Demura, M., Ganapathy, V. and Kamo, N. (2007) Heterologous expression of *Pharaonis* halorhodopsin in *Xenopus laevis* oocytes and electrophysiological characterization of its light-driven Cl-pump activity. *Biophys. J.* **92**, 2559–2569

18 Kolbe, M., Besir, H., Essen, L. O. and Oesterhelt, D. (2000) Structure of the light-driven chloride pump halorhodopsin at 1.8 Å resolution. *Science* **288**, 1390–1396

19 Kouyama, T., Kanada, S., Takeguchi, Y., Narusawa, A., Murakami, M. and Ihara, K. (2010) Crystal structure of the light-driven chloride pump halorhodopsin from *Natronomonas pharaonis*. *J. Mol. Biol.* **396**, 564–579



- 20 Schobert, B., Lanyi, J. K. and Oesterhelt, D. (1986) Effects of anion binding on the deprotonation reactions of halorhodopsin. *J. Biol. Chem.* **261**, 2690–2696
- 21 Sato, M., Kanamori, T., Kamo, N., Demura, M. and Nitta, K. (2002) Stopped-flow analysis on anion binding to blue-form halorhodopsin from *Natronobacterium pharaonis*: comparison with the anion-uptake process during the photocycle. *Biochemistry* **41**, 2452–2458
- 22 Scharf, B. and Engelhard, M. (1994) Blue halorhodopsin from *Natronobacterium pharaonis*: wavelength regulation by anions. *Biochemistry* **33**, 6387–6393
- 23 Chizhov, I. and Engelhard, M. (2001) Temperature and halide dependence of the photocycle of halorhodopsin from *Natronobacterium pharaonis*. *Biophys. J.* **81**, 1600–1612
- 24 Gradinaru, V., Thompson, K. R. and Deisseroth, K. (2008) eNpHR: a *Natronomonas* halorhodopsin enhanced for optogenetic applications. *Brain Cell Biol.* **36**, 129–139
- 25 Anton, J., Llobet-Brossa, E., Rodriguez-Valera, F. and Amann, R. (1999) Fluorescence *in situ* hybridization analysis of the prokaryotic community inhabiting crystallizer ponds. *Environ. Microbiol.* **1**, 517–523
- 26 Ng, W. V., Kennedy, S. P., Mahairas, G. G., Berquist, B., Pan, M., Shukla, H. D., Lasky, S. R., Baliga, N. S., Thorsson, V. and Sbrogna, J. (2000) Genome sequence of *Halobacterium* species NRC-1. *Proc. Natl. Acad. Sci. U.S.A.* **97**, 12176–12181
- 27 Sasaki, J., Brown, L. S., Chon, Y. S., Kandori, H., Maeda, A., Needleman, R. and Lanyi, J. K. (1995) Conversion of bacteriorhodopsin into a chloride ion pump. *Science* **269**, 73–75
- 28 Wang, W. W., Sineschekov, O. A., Spudich, E. N. and Spudich, J. L. (2003) Spectroscopic and photochemical characterization of a deep ocean proteorhodopsin. *J. Biol. Chem.* **278**, 33985–33991
- 29 Sharma, A. K., Walsh, D. A., Bapteste, E., Rodriguez-Valera, F., Ford Doolittle, W. and Papke, R. T. (2007) Evolution of rhodopsin ion pumps in haloarchaea. *BMC Evol. Biol.* **7**, 79
- 30 Ogurusu, T., Maeda, A., Sasaki, N. and Yoshizawa, T. (1981) Light-induced reaction of halorhodopsin prepared under low salt conditions. *J. Biochem.* **90**, 1267–1273
- 31 Duschl, A., Lanyi, J. K. and Zimanyi, L. (1990) Properties and photochemistry of a halorhodopsin from the haloalkalophile, *Natronobacterium pharaonis*. *J. Biol. Chem.* **265**, 1261–1267
- 32 Rüdiger, M., Haupts, U., Gerwert, K. and Oesterhelt, D. (1995) Chemical reconstitution of a chloride pump inactivated by a single point mutation. *EMBO J.* **14**, 1599
- 33 Rüdiger, M. and Oesterhelt, D. (1997) Specific arginine and threonine residues control anion binding and transport in the light-driven chloride pump halorhodopsin. *EMBO J.* **16**, 3813–3821
- 34 Haupts, U., Tittor, J., Bamberg, E. and Oesterhelt, D. (1997) General concept for ion translocation by halobacterial retinal proteins: the isomerization/switch/transfer (IST) model. *Biochemistry* **36**, 2–7
- 35 Yamashita, Y., Kikukawa, T., Tsukamoto, T., Kamiya, M., Aizawa, T., Kawano, K., Miyachi, S., Kamo, N. and Demura, M. (2011) Expression of *salinarum* halorhodopsin in *Escherichia coli* cells: solubilization in the presence of retinal yields the natural state. *Biochim. Biophys. Acta* **1808**, 2905–2912

---

Received 12 June 2012/15 June 2012; accepted 18 June 2012

Published as Immediate Publication 21 June 2012, doi 10.1042/BSR20120054

---

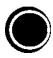

## SUPPLEMENTARY ONLINE DATA

# Ser<sup>262</sup> determines the chloride-dependent colour tuning of a new halorhodopsin from *Haloquadratum walsbyi*

Hsu-Yuan FU\*<sup>1</sup>, Yung-Ning CHANG\*<sup>1</sup>, Ming-Jin JHENG\* and Chii-Shen YANG\*†<sup>2</sup>

\*Department of Biochemical Science and Technology, College of Life Science, National Taiwan University, 1 Roosevelt Road, Taipei 10617, Taiwan, and †Institute of Biotechnology, College of Bio-Resources and Agriculture, National Taiwan University, 1 Roosevelt Road, Taipei 10617, Taiwan

See the following pages for Supplementary Figures S1–S4 and Supplementary Tables S1–S4.

<sup>1</sup> These authors contributed equally to this work.

<sup>2</sup> To whom correspondence should be addressed (email [chiishen@ntu.edu.tw](mailto:chiishen@ntu.edu.tw)).

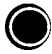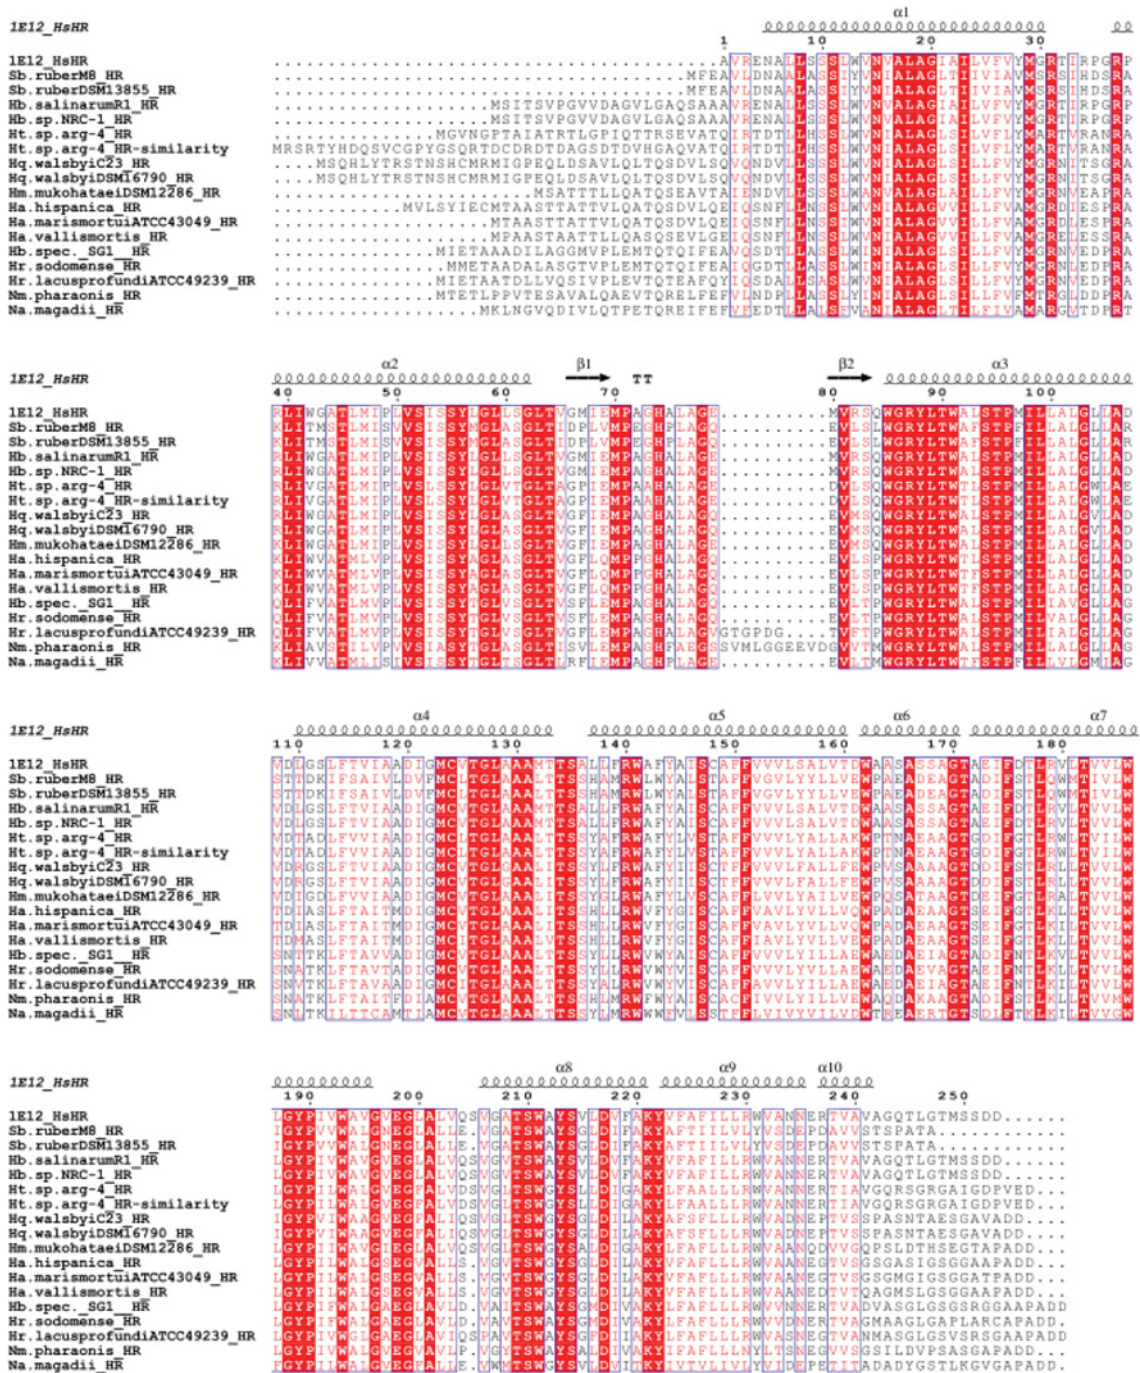

**Figure S1 Sequence alignments with secondary structure information of all known HRs**  
 Amino acids are marked with a red background or red colour representing high to low similarity, respectively. The atomic resolution structure information of *HsHR* (PDB ID: 1E12) was used for secondary structure information, which is shown in the first row. The results were created by ESPript 2.2 [1].

Downloaded from http://port.silverchair.com/bioscience/article-pdf/32/5/501/475074/bs0320501.pdf by guest on 25 April 2024

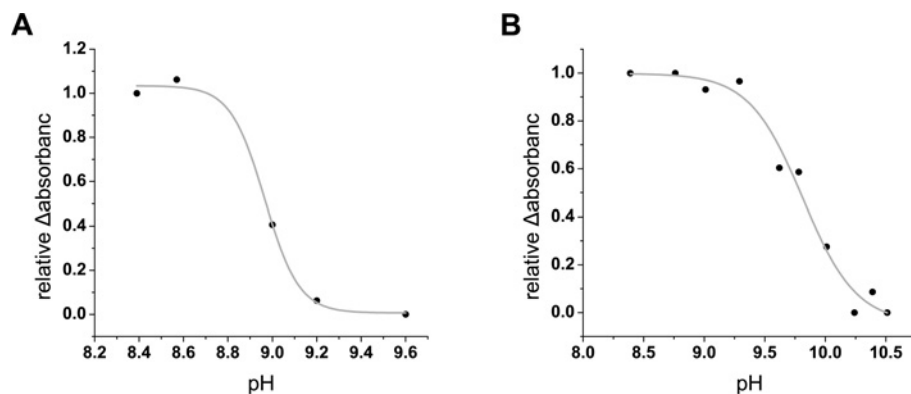

**Figure S2 Plots and fitting results of the  $pK_a$  determination of both *HmHR* (A) and *HwHR* (B)**

To study the spectral changes in acid or alkaline environments, a high concentration of HR sample in pH 5.8 (50 mM Mes and 4 M NaCl, pH 5.8) was diluted into different buffers with a pH of 3.095 to 10.93. In acidic conditions, both *HmHR* and *HwHR* showed a spectral shift of 7–9 nm toward the blue light region from the  $A_{max}$  of the ground state, whereas there were no significant spectral shifts in an alkaline environment; only the decrease in the ground state absorbance with a concomitant increase in the  $A_{410}$  species was observed. Spectral shifts from pH 8.4 to 10.5 were used to determine the  $pK_a$  of the Schiff base ( $Abs = Abs_{acidic} + Abs_{basic-acidic}(10^{pH - pK_a})$ ), and the calculated  $pK_a$  values of *HmHR* (A) and *HwHR* (B) were 8.96 and 9.81 respectively.

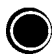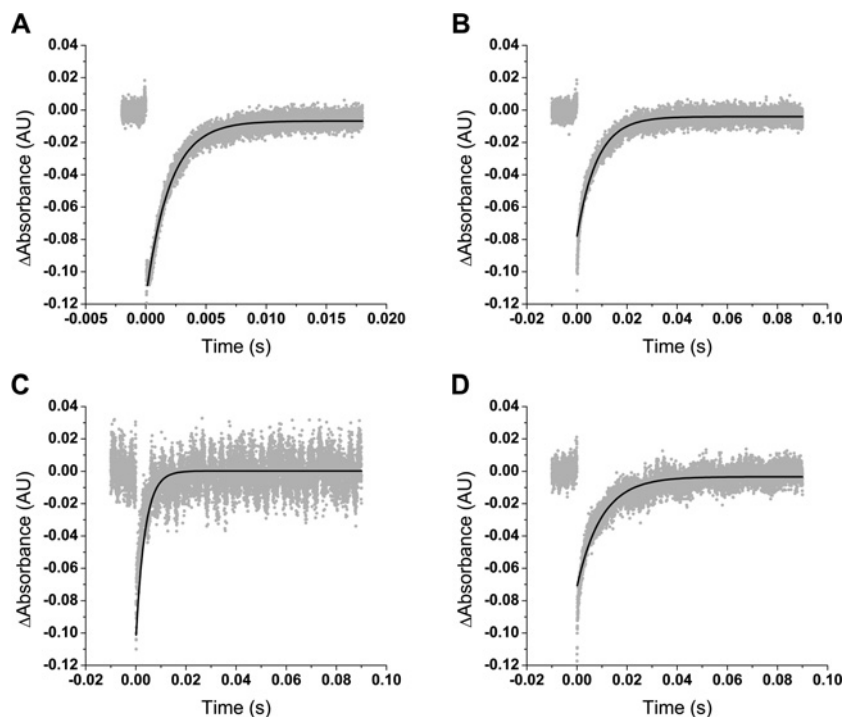

**Figure S3 Laser-induced absorbance changes of HRs under different buffer conditions**

The absorbance change was monitored at 570 nm. Both purified *HmHR* and *HwHR* suspended in the different buffer conditions mimic different physiological conditions. The results of *HmHR* (A) and *HwHR* (B) in 50 mM Mes, 5 mM NaCl, 333 mM Na<sub>2</sub>SO<sub>4</sub> and 0.05% DDM, pH 5.8; and *HmHR* (C) and *HwHR* (D) in 50 mM Mops, 4 M NaCl and 0.05% DDM, pH 7.0, were analysed and fit to one exponential decay for photocycle recovery half time and are summarized in Supplementary Table S2.

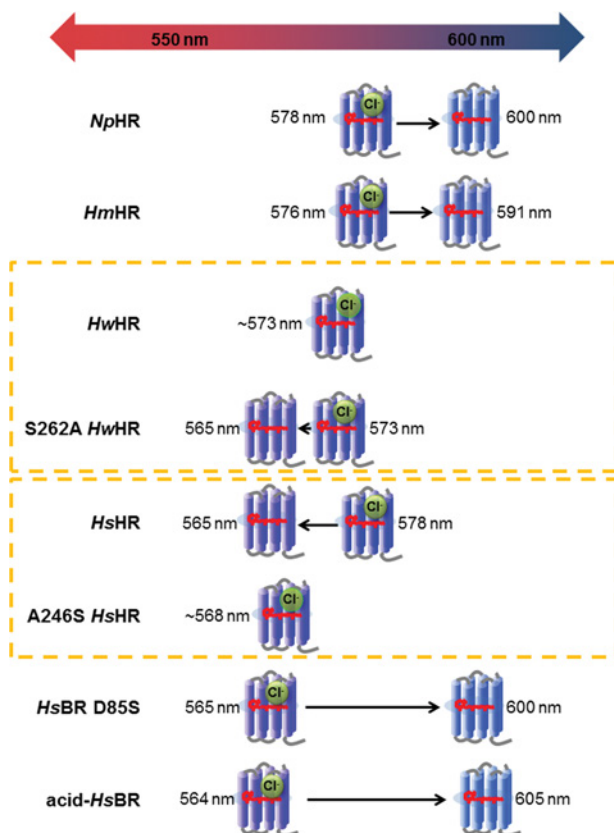

**Figure S4 Summary of the maximum absorbance shift under chloride binding/non-binding forms in the previous study [2] and in the present study**

The well-studied *NpHR* and *HsHR* proteins have a 22 nm and 13 nm spectral shift respectively. *HmHR* showed a similar absorbance change (15 nm) and trend (blueshift upon chloride binding) to those of *HsHR*. The similar chemical environment of both the protonated Schiff base and the chloride transfer pathway were considered based on the action spectra in *NpHR*, *HsBR D85S*, *acid-HsBR* and *HmHR*. *HwHR* showed the most stable action spectrum under the different chloride conditions.

**Table S1 Summary of known HRs in recent studies**

Genemo project annotation is used. At least ten HRs appear in the NCBI database (as of 19 June 2012). –, not annotated; c, complement.

| Organism                                            | Gene name                  | Locus              | Amino acid number | GenBank® accession no. |
|-----------------------------------------------------|----------------------------|--------------------|-------------------|------------------------|
| Prokaryota (Euryarchaeota)                          |                            |                    |                   |                        |
| <i>Halalkalicoccus jeotgali</i> B3                  | –                          | –                  | –                 | –                      |
| <i>Haloarcula hispanica</i>                         | <i>hop</i>                 | c(2125932–2126786) | 284               | AEM57789.1             |
| <i>Haloarcula marismortui</i> ATCC 43049            | <i>hop</i>                 | c(1489351–1490181) | 276               | YP_136278.1            |
| <i>Halobacterium salinarum</i> R1                   | <i>hop</i>                 | c(155843–156667)   | 274               | CAP13054.1             |
| <i>Halobacterium</i> sp. NRC-1                      | <i>hop</i>                 | c(155681–156505)   | 274               | AAG18795.1             |
| <i>Haloferax mediterranei</i> ATCC 33500            | –                          | –                  | –                 | –                      |
| <i>Haloferax volcanii</i> DS2                       | –                          | –                  | –                 | –                      |
| <i>Halogeometricum borinquense</i> DSM 11551        | –                          | –                  | –                 | –                      |
| <i>Halomicrobium mukohataei</i> DSM 12286           | –                          | 1007876–1008697    | 273               | ACV47184.1             |
| <i>Haloquadratum walsbyi</i> DSM 16790              | <i>hop</i>                 | c(2371913–2372791) | 292               | CAJ53165.1             |
| <i>Halorhabdus utahensis</i> DSM 12940              | –                          | –                  | –                 | –                      |
| <i>Halorubrum lacusprofundi</i> ATCC 49239          | –                          | c(590870–591745)   | 291               | ACM56176.1             |
| <i>Haloterrigena turkmenica</i> DSM 5511            | –                          | –                  | –                 | –                      |
| <i>Natronomonas pharaonis</i> DSM 2160              | <i>hop</i>                 | c(327687–328562)   | 291               | CAI48412.1             |
| <i>Natrialba magadii</i> ATCC 43099                 | –                          | 2653987–2654826    | 279               | ADD06141.1             |
| <i>Halopiger xanaduensis</i> SH-6                   | –                          | –                  | –                 | –                      |
| <i>Haloquadratum walsbyi</i> C23                    | <i>hop</i>                 | c(2566001–2566879) | 292               | CCC41335.1             |
| Prokaryota (bacteroidetes/chlorobi)                 |                            |                    |                   |                        |
| <i>Salinibacter ruber</i> DSM 13855                 | –                          | 3439239–3439988    | 249               | ABC44173.1             |
| <i>Salinibacter ruber</i> M8                        | <i>Halorhodopsin</i>       | 3510167–3510916    | 249               | CBH25915.1             |
| <b>Protein sequenced</b>                            |                            |                    |                   |                        |
| <i>Halobacteriaceae</i> gen. sp.                    | <i>Halorhodopsin</i>       | A56808             | 239 (fragment)    | –                      |
| <i>Haloterrigena</i> sp. <i>arg-4</i>               | <i>Halorhodopsin</i>       | BAA75201           | 282               | BAA75201.2             |
| <i>Halorubrum sodomense</i>                         | <i>Halorhodopsin</i>       | BAA75202           | 282               | BAA75202.1             |
| <i>Halobacterium</i> sp. SG1                        | <i>Halorhodopsin</i>       | CAA49773           | 284               | CAA49773.1             |
| ' <i>Haloterrigena</i> ' sp. (strain <i>arg-4</i> ) | <i>Halorhodopsin</i>       | T43838             | 297               | –                      |
| <i>Haloarcula vallismortis</i>                      | <i>Cruxhalorhodopsin-3</i> | BAA06679           | 276               | BAA06679.1             |

**Table S2 Summary of the the half-time of the ground state recovery of HmHR and HwHR in various conditions**

| Protein | 50 mM Mes, 4 M NaCl<br>and 0.05% DDM,<br>pH 5.8 | 50 mM Mes, 5 mM NaCl,<br>333 mM Na <sub>2</sub> SO <sub>4</sub><br>and 0.05% DDM, pH 5.8 | 50 mM Mops, 4 M NaCl<br>and 0.05% DDM,<br>pH 7.0 |
|---------|-------------------------------------------------|------------------------------------------------------------------------------------------|--------------------------------------------------|
| HmHR    | 4.17 ms                                         | 2.02 ms                                                                                  | 3.58 ms                                          |
| HwHR    | 3.23 ms                                         | 7.93 ms                                                                                  | 9.87 ms                                          |

**Table S3 Summary of the features of known HRs in the present and previous studies**

The identities of these sequences of HRs, maximum absorbance values,  $pK_a$  values (Supplementary Figure S2) and disassociation constants of chloride anions ( $K_d$ ) are compiled. The smallest spectral shift was observed in HwHR.

| Parameter               | HsHR*                   | NpHR†                 | HmHR                    | HwHR                  |
|-------------------------|-------------------------|-----------------------|-------------------------|-----------------------|
| Identity‡               | —                       | 55%                   | 62%                     | 68%                   |
|                         | 55%                     | —                     | 61%                     | 56%                   |
| Maximum absorbance (nm) | 578                     | 575                   | 576                     | 573                   |
| $pK_a$                  | 8.9 or 9.5              | 9.6                   | 8.9                     | 9.8                   |
| $K_d$ (chloride)        | 10 mM (blueshift 10 nm) | 3 mM (redshift 20 nm) | 9.7 mM (redshift 15 nm) | 4 mM (blueshift 3 nm) |

\*Data obtained from [3].

†Data obtained from [4].

‡Calculated from ClustalW (<http://www.genome.jp/tools/clustalw/>)

**Table S4 Summarized spectral features and functions of the HRs in the present study**

The maximum absorbance values, chloride-dependent spectral property, disassociation constants of chloride anions ( $K_d$ ) photocycle and functions are compiled. —, not detectable.

| Parameter                            | HmHR             | HwHR             | S262A HwHR       | A246S HsHR |
|--------------------------------------|------------------|------------------|------------------|------------|
| $\lambda_{max}$                      | 576 nm           | 573 nm           | 573 nm           | 568 nm     |
| Chloride-dependent absorbance change | 15 nm (redshift) | 3 nm (blueshift) | 8 nm (blueshift) | 0 nm       |
| $K_d$ (chloride)                     | 7.47 mM          | 2.74 mM          | 10.88 mM         | 23.22 mM   |
| Half-time of ground state recovery   | 4.17 ms          | 3.23 ms          | 3.28 ms          | 16.00 ms   |
| Light-driven chloride translocation  | Yes              | Yes              | Yes              | —          |

## REFERENCES

- Gouet, P., Courcelle, E., Stuart, D. I. and Métoz, F. (1999) ESPrInt: analysis of multiple sequence alignments in PostScript. *Bioinformatics* **15**, 305–308
- Kubo, M., Kikukawa, T., Miyauchi, S., Seki, A., Kamiya, M., Aizawa, T., Kawano, K., Kamo, N. and Demura, M. (2009) Role of Arg123 in light-driven anion pump mechanisms of *pharaonis* halorhodopsin. *Photochem. Photobiol.* **85**, 547–555
- Schobert, B., Lanyi, J. K. and Oesterhelt, D. (1986) Effects of anion binding on the deprotonation reactions of halorhodopsin. *J. Biol. Chem.* **261**, 2690–2696
- Scharf, B. and Engelhard, M. (1994) Blue halorhodopsin from *Natronobacterium pharaonis*: wavelength regulation by anions. *Biochemistry* **33**, 6387–6393

Received 12 June 2012/15 June 2012; accepted 18 June 2012

Published as Immediate Publication 21 June 2012, doi 10.1042/BSR20120054
